# Supplementary material for: Dynamics of Adaptive Immune Cell and NK Cell Subsets in Patients With Ankylosing Spondylitis After IL-17A Inhibition by Secukinumab
Source: PubMed Central journal article supplement (PMC8551761; doi:10.3389/fphar.2021.738316), 2021-10-14
Supplement: Image1.pdf [file Image1.pdf]

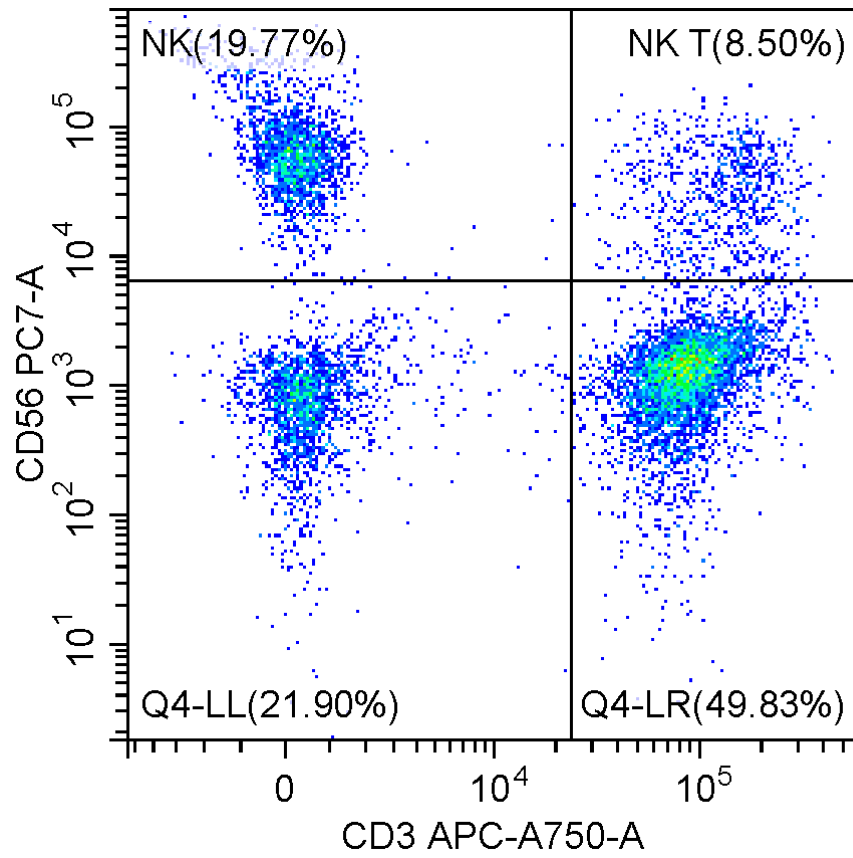

**Supplementary Figure 1 Representative gating strategy to identify NK and NKT-like cells. NK, nature kill.**
